# Supplementary material
Source: PubMed Central journal article supplement (PMC10614165)
Supplement: NIHMS1937676-supplement-2.pdf [file NIHMS1937676-supplement-2.pdf]

## ■ ASSOCIATED CONTENT

### SI Supporting Information

The Supporting Information is available free of charge at <https://pubs.acs.org/doi/10.1021/acsami.3c00862>.

Materials, instrumentation, mass spectroscopy, peptide synthesis, AuNP synthesis, ligand exchange, gel electrophoresis, TEM, aggregation assays, working window, and matrices test control ([PDF](#))
